# Supplementary material for: Enhanced Nitrite-Mediated Relaxation of Placental Blood Vessels Exposed to Hypoxia Is Preserved in Pregnancies Complicated by Fetal Growth Restriction
Source: MDPI journal article supplement (doi:10.3390/ijms22094500), 2021-04-26
Supplement: s1 [file s1]

## Supplementary data

**Supplementary Table 1**

**Vasorelaxation to NaNO<sub>2</sub> and SNP in human placental vessels isolated from normal and FGR placentas.**

| Experimental condition |                             | Normal                  |                         | FGR                   |                         |
|------------------------|-----------------------------|-------------------------|-------------------------|-----------------------|-------------------------|
| NaNO <sub>2</sub>      | LogEC <sub>50</sub> (mol/L) | Normoxia                | Hypoxia                 | Normoxia              | Hypoxia                 |
|                        | CPAs                        | -3.728 ± 0.123          | -3.777 ± 0.137          | -3.767 ± 0.133        | -3.865 ± 0.174          |
|                        | CPVs                        | -3.677 ± 0.122          | -3.665 ± 0.137          | -3.593 ± 0.175        | -3.762 ± 0.201          |
|                        | Vmax (%)                    | Normoxia <sup>e</sup>   | Hypoxia                 | Normoxia <sup>e</sup> | Hypoxia                 |
|                        | CPAs <sup>c</sup>           | 59.7 ± 4.8 <sup>b</sup> | 69.7 ± 4.2 <sup>b</sup> | 58.4 ± 6.5            | 73.0 ± 4.1 <sup>b</sup> |
|                        | CPVs                        | 40.4 ± 4.0              | 53.0 ± 4.5              | 40.3 ± 5.3            | 46.5 ± 3.7              |
| SNP                    | LogEC <sub>50</sub> (mol/L) | Normoxia <sup>b</sup>   | Hypoxia                 | Normoxia <sup>b</sup> | Hypoxia                 |
|                        | CPAs <sup>a</sup>           | -7.624 ± 0.186          | -7.226 ± 0.191          | -7.302 ± 0.241        | -7.251 ± 0.197          |
|                        | CPVs <sup>g</sup>           | -7.176 ± 0.147          | -7.385 ± 0.134          | -6.611 ± 0.183        | -6.869 ± 0.186          |
|                        | Vmax (%)                    | Normoxia <sup>f</sup>   | Hypoxia                 | Normoxia <sup>e</sup> | Hypoxia                 |
|                        | CPAs                        | 66.6 ± 5.2              | 75.8 ± 3.6              | 68.1 ± 6.6            | 79.4 ± 5.3              |
|                        | CPVs                        | 61.7 ± 4.3 <sup>f</sup> | 79.8 ± 3.3              | 57.1 ± 4.6            | 73.6 ± 5.1              |

LogEC<sub>50</sub> (logarithm of the molar concentration of each drug causing 50% of the maximal relaxation), and Vmax (maximum relaxation), for NaNO<sub>2</sub>- and SNP-mediated vasorelaxation in each experimental condition (see Results in the main text). <sup>a</sup>  $p < 0.05$ , <sup>b</sup>  $p < 0.01$ , <sup>c</sup>  $p < 0.001$ , <sup>d</sup>  $p < 0.0001$ , CPAs vs CPVs; <sup>e</sup>  $p < 0.05$ , <sup>f</sup>  $p < 0.01$  normoxia vs hypoxia; <sup>g</sup>  $p < 0.05$ , Normal vs FGR. All data are mean ± SEM.

CPAs

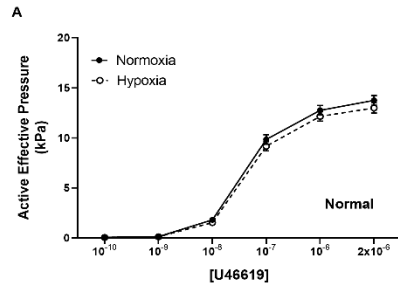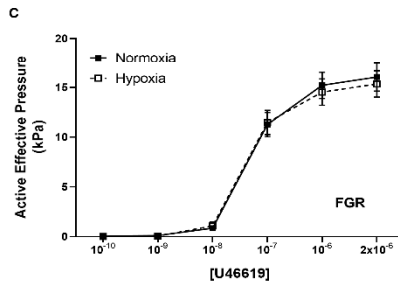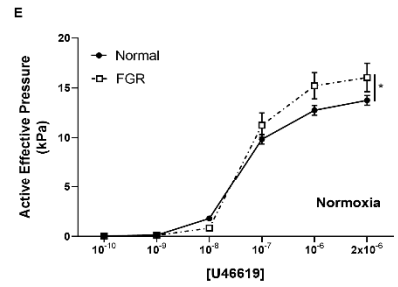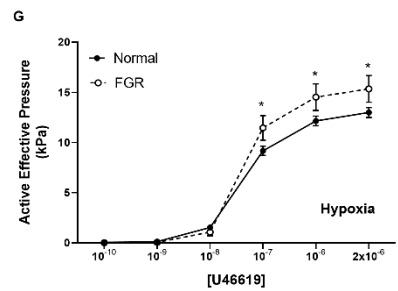

CPVs

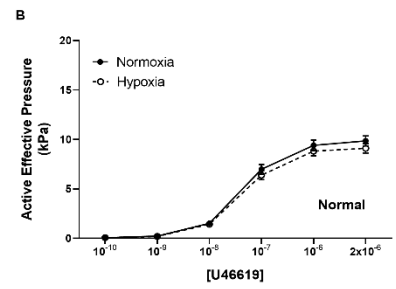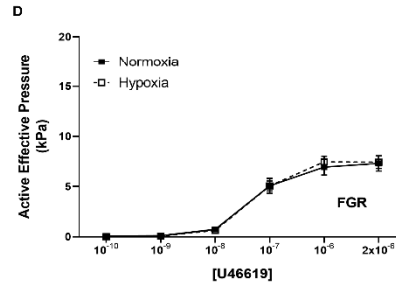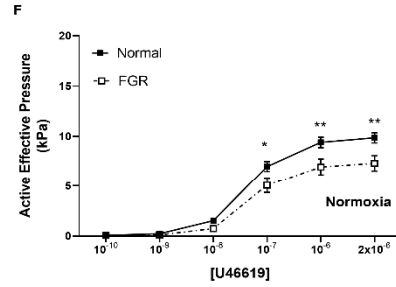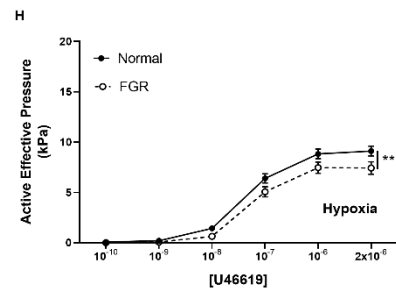

**Supplementary Figure 1. U46619-induced vasoconstriction of CPAs and CPVs isolated from normal and FGR placentas.** Concentration-dependent vasoconstricting effect of U46619 on: normal CPAs (A) and CPVs (B), FGR CPAs (C) and CPVs (D), in normoxia and hypoxia; normoxic CPAs (E) and CPVs (F), hypoxic CPAs (G) and CPVs (H), from normal and FGR pregnancies. \*  $p < 0.05$ , \*\*  $p < 0.01$ , normal vs FGR. Data are presented as active effective pressure, expressed in kPa. All data are mean  $\pm$  SEM.  $n = 16-75$  placentas.

## Supplementary Table 2

**U46619 EC<sub>80</sub> doses applied to chorionic plate vessels isolated from normal and FGR placentas.**

| U46619<br>LogEC <sub>80</sub><br>(mol/L) | Normal                      |                      | FGR                         |                             |
|------------------------------------------|-----------------------------|----------------------|-----------------------------|-----------------------------|
|                                          | Normoxia <sup>a</sup>       | Hypoxia <sup>a</sup> | Normoxia <sup>b</sup>       | Hypoxia <sup>b</sup>        |
| CPAs                                     | -6.945 ± 0.016 <sup>a</sup> | -6.930 ± 0.0158      | -6.981 ± 0.019 <sup>a</sup> | -6.963 ± 0.020 <sup>a</sup> |
| CPVs                                     | -6.867 ± 0.030              | -6.901 ± 0.030       | -6.829 ± 0.058              | -6.803 ± 0.064              |

LogEC<sub>80</sub>, logarithm of the molar concentration of U46619 causing 80% of the maximal vasoconstriction prior to assessment of dose-response curves to either NaNO<sub>2</sub> or SNP. CPVs were significantly less sensitive to U46619 and required a higher concentration of the thromboxane mimetic to achieve EC<sub>80</sub> pre-constriction compared with CPAs (<sup>a</sup>  $p < 0.05$ , <sup>b</sup>  $p < 0.01$ , CPAs vs CPVs). Oxygen tension did not affect U46619 EC<sub>80</sub> concentrations in either vessel types. All data are mean ± SEM. n = 16-75 placentas.
